# Supplementary material
Source: PubMed Central journal article supplement (PMC1809977)
Supplement: 15101433supp.pdf [file 15101433supp.pdf]

This is an electronic appendix to the Biology Letter by Hughes & Boomsma 2004  
 Let your enemy do the work: within-host interactions between two fungal  
 parasites of leaf-cutting ants. *Proc. R. Soc. Lond. B (Suppl.)* **271**, S104–  
 S106.10.1098/rsbl.2003.0115.)

Electronic appendices are refereed with the text. However, no attempt has been made  
 to impose a uniform editorial style on the electronic appendices.

### Electronic Appendix A

Table 1. Results of the Cox regression model for survival, showing the relevant terms identified  
 by the model<sup>a</sup>.

| Factors <sup>b</sup>   | <i>B</i> <sup>c</sup> | s.e. <sup>d</sup> | Wald <sup>e</sup> | df | <i>P</i> <sup>f</sup> | Odds <sup>g</sup> |
|------------------------|-----------------------|-------------------|-------------------|----|-----------------------|-------------------|
| Treatment              |                       |                   | 24.2              | 6  | < 0.001               |                   |
| Asp 10 <sup>4</sup>    | 0.086                 | 0.518             | 0.028             | 1  | 0.868                 | 1.09              |
| Asp 10 <sup>5</sup>    | -0.213                | 0.556             | 0.146             | 1  | 0.702                 | 0.808             |
| Asp 10 <sup>6</sup>    | 0.661                 | 0.476             | 1.93              | 1  | 0.165                 | 1.94              |
| Asp 10 <sup>7</sup>    | 1.13                  | 0.446             | 6.46              | 1  | 0.011                 | 3.12              |
| Mt 10 <sup>5</sup>     | 1.37                  | 0.440             | 9.75              | 1  | 0.002                 | 3.95              |
| Asp+Mt 10 <sup>5</sup> | 1.03                  | 0.453             | 5.18              | 1  | 0.023                 | 2.81              |

<sup>a</sup> The complete analysis included the factors treatment and colony, and the interaction between these factors. Treatment and colony were entered as categorical variables using simple and deviance coding, respectively, with the control treatment and first colony set as reference categories. The best model was obtained by a forward selection procedure and contained only the treatment factor as both the colony and treatment x colony terms were nonsignificant.

<sup>b</sup> Treatments were *Aspergillus flavus* (Asp) at a range of doses, *Metarhizium anisopliae* var. *anisopliae* (Mt) at 1 x 10<sup>5</sup> spores ml<sup>-1</sup>, a mixed 1 x 10<sup>5</sup> spores ml<sup>-1</sup> dose of *A. flavus* and *M. anisopliae* var. *anisopliae*, or a control solution.

<sup>c</sup> Regression coefficient for the overall survival function for each factor.

<sup>d</sup> Standard error of the regression coefficient.

<sup>e</sup> Wald statistic for factor.

<sup>f</sup> Significance level for the Wald statistic.

<sup>g</sup> Odds ratio of survival for the factor relative to the control ( $\exp(b)$ ).
